# Supplementary material for: Prognostic value of peripheral blood T lymphocyte subsets in clear cell renal cell carcinoma
Source: PubMed Central journal article supplement — Transl Androl Urol. 2021 Jan;10(1):326–35. doi: 10.21037/tau-20-1066 (PMC7844521; doi:10.21037/tau-20-1066), 2021-01
Supplement: tau-10-01-326-dss.pdf [file tau-10-01-326-dss.pdf]

## Data Sharing Statement

|                     |                                                                                                                                                     |                                                                                                                 |
|---------------------|-----------------------------------------------------------------------------------------------------------------------------------------------------|-----------------------------------------------------------------------------------------------------------------|
| <b>Article Info</b> | http://dx.doi.org/10.21037/tau-20-1066.                                                                                                             |                                                                                                                 |
| <b>Item</b>         | <b>Question</b>                                                                                                                                     | <b>Authors' Response<br/>(place - if not applicable)</b>                                                        |
| 1                   | Would you like to share data collected for your study to others?                                                                                    | Yes                                                                                                             |
| 2                   | If not, would you like to share the reason for your decision?                                                                                       | -                                                                                                               |
| 3                   | What data in particular will be shared?                                                                                                             | All the data.                                                                                                   |
| 4                   | Any other documents will be shared? Such as study protocol, statistical analysis plan, informed consent form, clinical study report, analytic code. | No.                                                                                                             |
| 5                   | When will data availability begin?                                                                                                                  | When the article is published.                                                                                  |
| 6                   | When will data availability end?                                                                                                                    | Three years after the article is published.                                                                     |
| 7                   | To whom will you share the data?                                                                                                                    | All the readers.                                                                                                |
| 8                   | For what type of analysis or purpose?                                                                                                               | Medical oncologists and kidney surgeons who are interested in studies of peripheral blood T lymphocyte subsets. |
| 9                   | How or where can the data/documents be obtained?                                                                                                    | Emails could be sent to the address below to obtain the shared data:<br>zhouyh69@mail.sysu.edu.cn               |
| 10                  | Any other restrictions?                                                                                                                             | -                                                                                                               |
