# Supplementary material for: Prognostic value of peripheral blood T lymphocyte subsets in clear cell renal cell carcinoma
Source: PubMed Central journal article supplement — Transl Androl Urol. 2021 Jan;10(1):326–35. doi: 10.21037/tau-20-1066 (PMC7844521; doi:10.21037/tau-20-1066), 2021-01
Supplement: tau-10-01-326-supplementary.pdf [file tau-10-01-326-supplementary.pdf]

**Supplementary****Table S1** Distribution of T lymphocyte subsets in patients with ccRCC

| Variables                          | Low |         |                    | High |          |                    |
|------------------------------------|-----|---------|--------------------|------|----------|--------------------|
|                                    | n   | mean    | Standard deviation | n    | mean     | Standard deviation |
| CD3 <sup>+</sup> T cell            | 22  | 552.550 | 106.3              | 58   | 1390.120 | 597.627            |
| CD4 <sup>+</sup> T cell            | 33  | 324.610 | 86.495             | 47   | 845.170  | 342.790            |
| CD8 <sup>+</sup> T cell            | 15  | 182.4   | 40.194             | 65   | 520.020  | 256.719            |
| CD4 <sup>+</sup> /CD8 <sup>+</sup> | 15  | 0.768   | 0.168              | 65   | 1.634    | 0.513              |
